# Supplementary material for: Reconstruction of Radiation Dose Received by Diagnostic Radiologic Technologists in Korea
Source: PubMed Central journal article supplement — J Prev Med Public Health. 2016 Aug 23;49(5):288–300. doi: 10.3961/jpmph.16.064 (PMC5066420; doi:10.3961/jpmph.16.064), 2016-08-23
Supplement: jpmph-49-5-288-supple1.pdf [file jpmph-49-5-288-supple1.pdf]

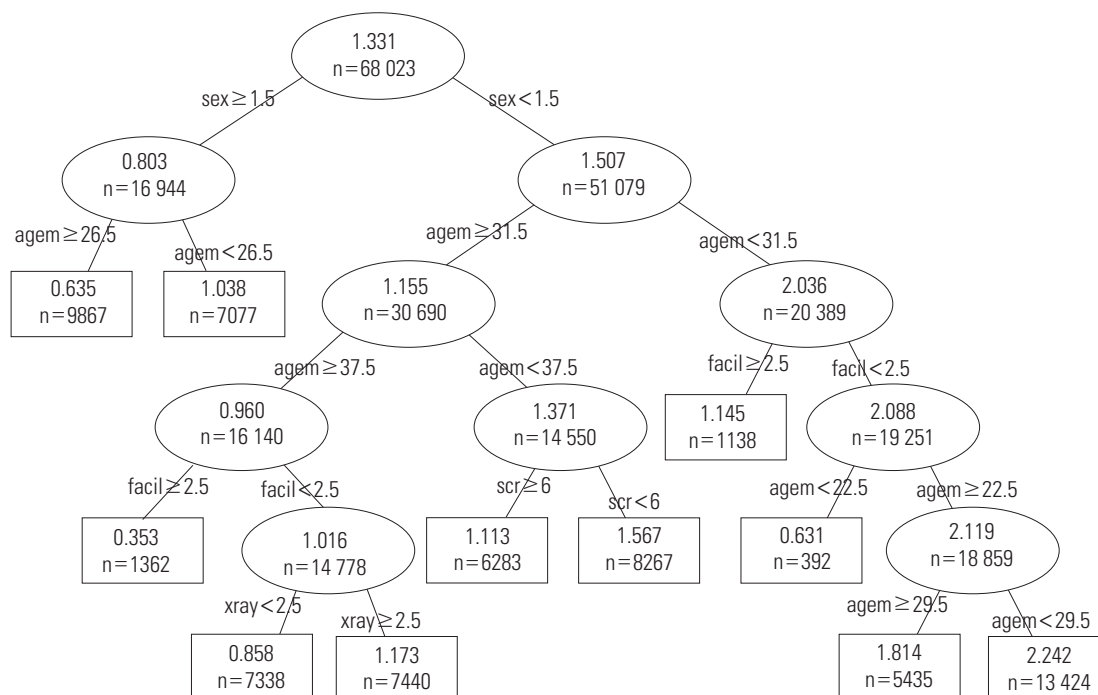

**Supplemental Figure 1.** Pruned regression tree of annual doses for radiologic technologists, 1996–2011. Elliptical nodes indicate internal nodes, while rectangular nodes denote terminal nodes. *agem*, age in the year of exposure; *facil*, type of facility; *xray*, frequency of diagnostic X-ray (categorical); *scr*, frequency of screen protection (categorical).
