# Supplementary material for: Reconstruction of Radiation Dose Received by Diagnostic Radiologic Technologists in Korea
Source: PubMed Central journal article supplement — J Prev Med Public Health. 2016 Aug 23;49(5):288–300. doi: 10.3961/jpmph.16.064 (PMC5066420; doi:10.3961/jpmph.16.064), 2016-08-23
Supplement: jpmph-49-5-288-supple2.pdf [file jpmph-49-5-288-supple2.pdf]

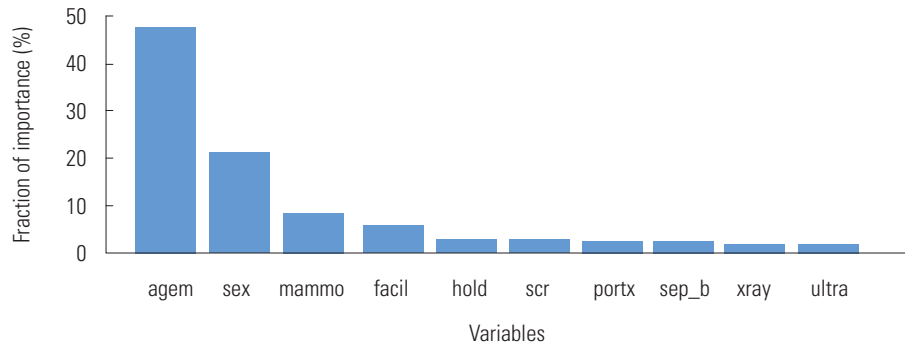

**Supplemental Figure 2.** Sorted variable importance in the tree regression analysis for radiologic technologists. Variable importance refers to the total amount of reduced variability (e.g., residual sum of squares) attributable to splits over each variable in a given tree. aagem, age in the year of exposure; mammo, frequency of mammography; facil, type of facility; hold, whether the participant holds the patients while conducting the task or not; scr, frequency of screen protection; portx, frequency of portable X-ray; sep\_b, whether the participant is always separated from the patients or not; xray, frequency of diagnostic X-ray; ultra, frequency of ultrasound examination.
