# Supplementary material for: Reconstruction of Radiation Dose Received by Diagnostic Radiologic Technologists in Korea
Source: PubMed Central journal article supplement — J Prev Med Public Health. 2016 Aug 23;49(5):288–300. doi: 10.3961/jpmph.16.064 (PMC5066420; doi:10.3961/jpmph.16.064), 2016-08-23
Supplement: jpmph-49-5-288-supple3.pdf [file jpmph-49-5-288-supple3.pdf]

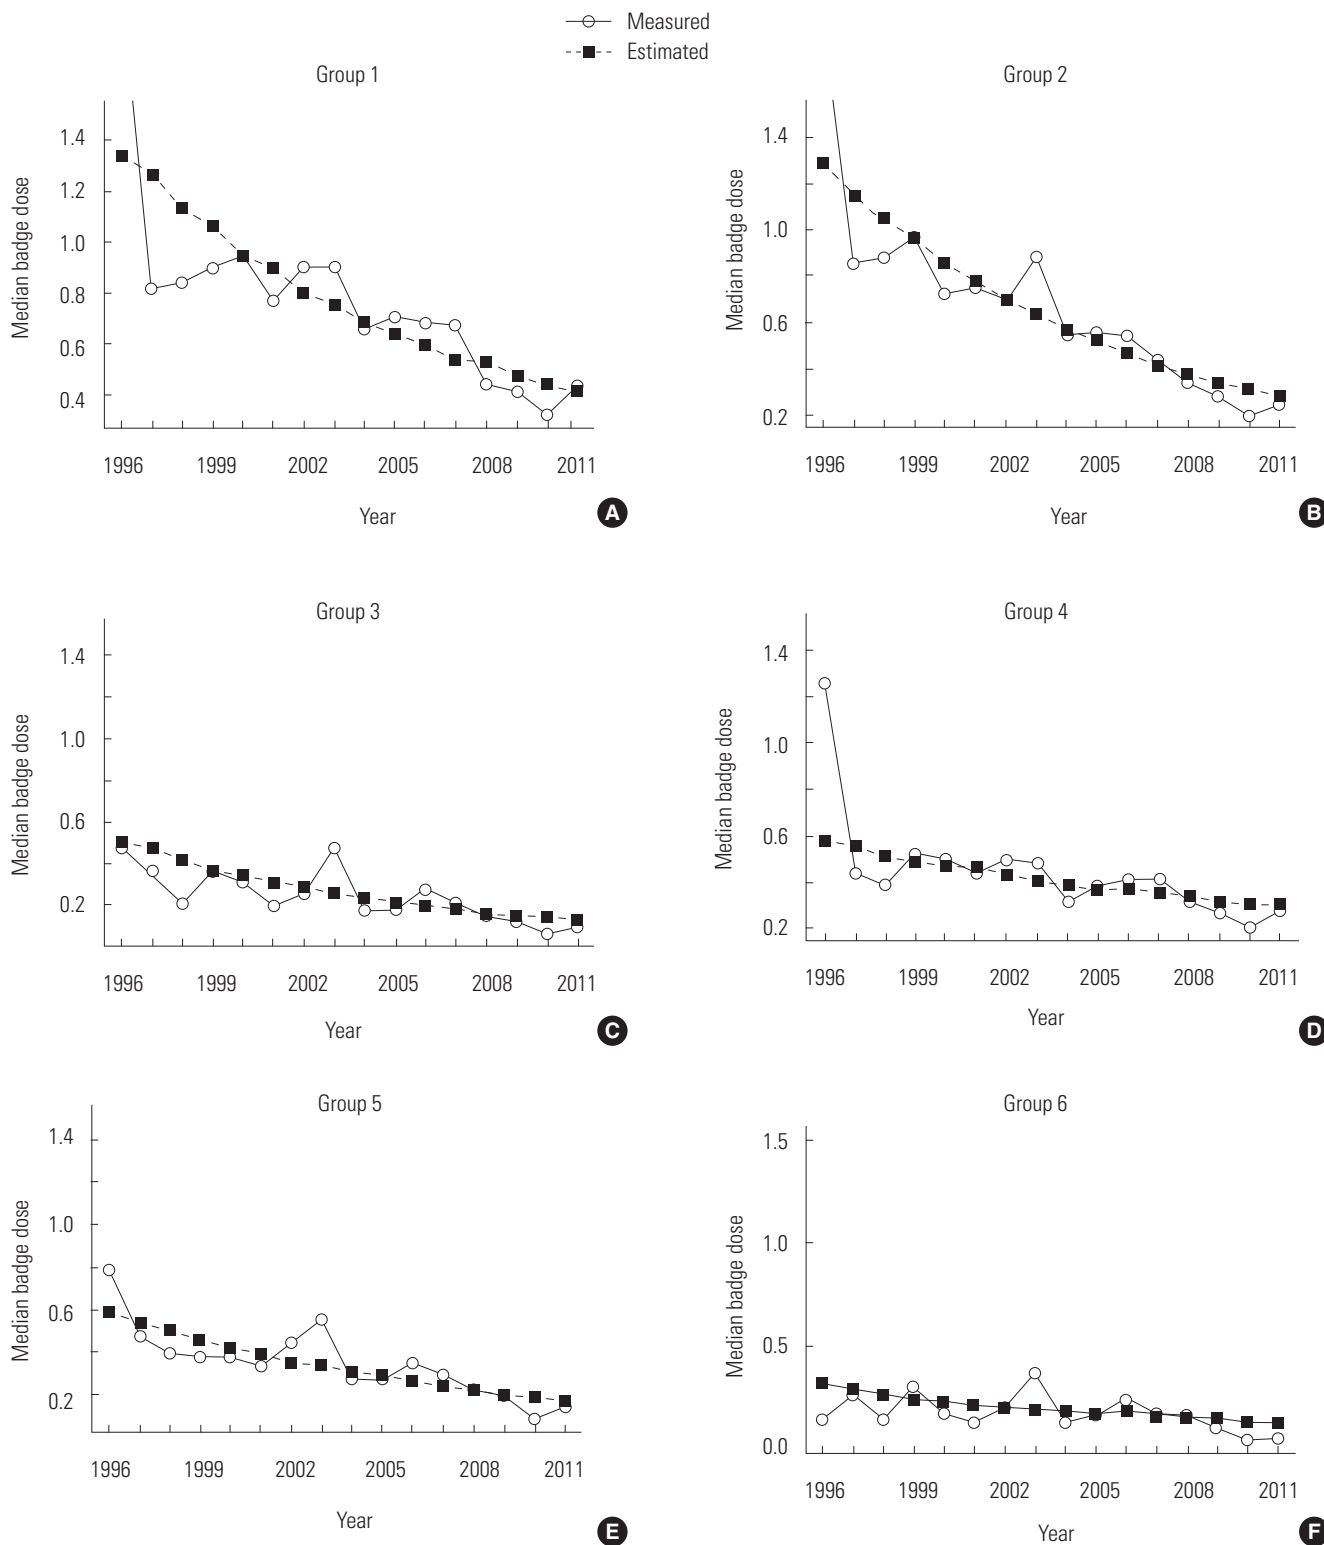

**Supplemental Figure 3.** Comparison of median estimated doses with median measured doses by group of radiologic technologists, 1996–2011. (A) Group 1, male hospital workers; (B) Group 2, male clinic workers; (C) Group 3, male others workers; (D) Group 4, female hospital workers; (E) Group 5, female clinic workers; (F) Group 6, female others workers.
