# Supplementary material for: Reconstruction of Radiation Dose Received by Diagnostic Radiologic Technologists in Korea
Source: PubMed Central journal article supplement — J Prev Med Public Health. 2016 Aug 23;49(5):288–300. doi: 10.3961/jpmph.16.064 (PMC5066420; doi:10.3961/jpmph.16.064), 2016-08-23
Supplement: jpmph-49-5-288-supple4.pdf [file jpmph-49-5-288-supple4.pdf]

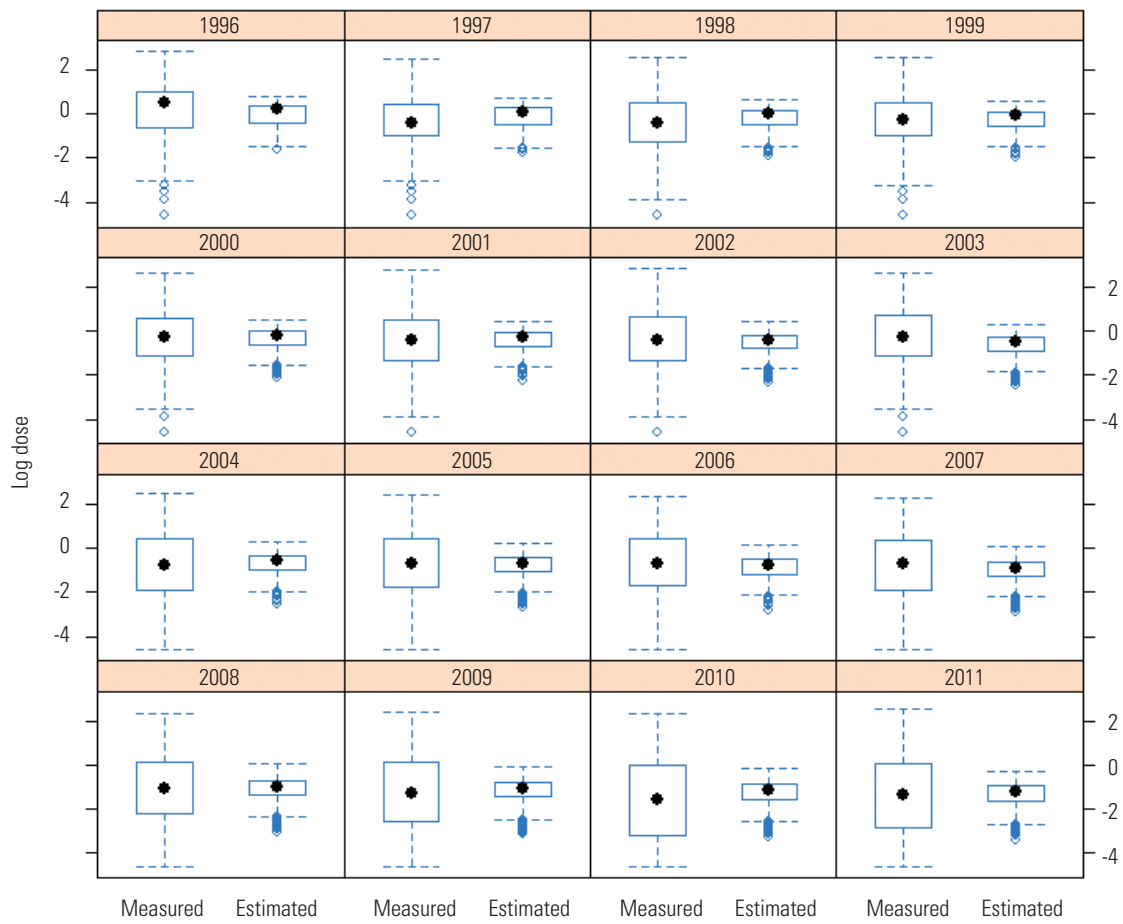

**Supplemental Figure 4.** Distributions of measured and estimated radiation doses for radiologic technologists, 1996–2011.
