# Supplementary material for: Reconstruction of Radiation Dose Received by Diagnostic Radiologic Technologists in Korea
Source: PubMed Central journal article supplement — J Prev Med Public Health. 2016 Aug 23;49(5):288–300. doi: 10.3961/jpmph.16.064 (PMC5066420; doi:10.3961/jpmph.16.064), 2016-08-23
Supplement: jpmph-49-5-288-supple5.pdf [file jpmph-49-5-288-supple5.pdf]

**Supplemental Table 1.** Estimated median badge doses (mSv) in the pre-1996 period by 6 group of radiologic technologists

| Calendar year | 1    | 2     | 3    | 4    | 5    | 6    |
|---------------|------|-------|------|------|------|------|
| 1971          | 9.45 | 10.63 | -    | -    | -    | -    |
| 1972          | 8.49 | 9.49  | -    | -    | -    | -    |
| 1973          | 8.03 | 8.59  | -    | -    | -    | -    |
| 1974          | 7.96 | 7.67  | -    | -    | -    | -    |
| 1975          | 7.16 | 7.49  | -    | -    | -    | -    |
| 1976          | 6.43 | 7.09  | -    | -    | -    | -    |
| 1977          | 5.93 | 7.03  | 0.78 | -    | -    | -    |
| 1978          | 5.74 | 6.37  | 0.71 | 0.62 | -    | 0.47 |
| 1979          | 5.16 | 5.86  | 0.69 | 0.61 | -    | 0.43 |
| 1980          | 4.87 | 5.55  | 0.83 | 0.70 | 1.52 | 0.41 |
| 1981          | 4.60 | 5.10  | 0.78 | 0.71 | 1.46 | 0.43 |
| 1982          | 4.13 | 4.69  | 0.73 | 0.72 | 1.47 | 0.43 |
| 1983          | 3.90 | 4.18  | 0.73 | 0.78 | 1.35 | 0.40 |
| 1984          | 3.51 | 3.73  | 0.83 | 0.80 | 1.33 | 0.40 |
| 1985          | 3.15 | 3.43  | 0.82 | 0.75 | 1.23 | 0.40 |
| 1986          | 2.98 | 3.06  | 0.87 | 0.69 | 1.18 | 0.44 |
| 1987          | 2.81 | 2.82  | 0.77 | 0.67 | 1.09 | 0.41 |
| 1988          | 2.53 | 2.51  | 0.73 | 0.64 | 1.01 | 0.37 |
| 1989          | 2.39 | 2.24  | 0.69 | 0.60 | 0.92 | 0.37 |
| 1990          | 2.25 | 2.06  | 0.61 | 0.55 | 0.85 | 0.34 |
| 1991          | 2.13 | 1.84  | 0.57 | 0.53 | 0.78 | 0.30 |
| 1992          | 1.91 | 1.69  | 0.51 | 0.50 | 0.71 | 0.27 |
| 1993          | 1.81 | 1.51  | 0.45 | 0.46 | 0.64 | 0.24 |
| 1994          | 1.62 | 1.39  | 0.42 | 0.44 | 0.60 | 0.22 |
| 1995          | 1.53 | 1.24  | 0.37 | 0.41 | 0.54 | 0.20 |
